# Supplementary material
Source: PubMed Central journal article supplement (PMC5948147)
Supplement: NIHMS946506-supplement-312082_Acknow.pdf [file NIHMS946506-supplement-312082_Acknow.pdf]

## Circulation Research

---

**Subject:** FW: Dr. O'Rourke acknowledgement in manuscript CIRCRES/2017/312082R2

**From:** Brian O'Rourke <[bor@jhmi.edu](mailto:bor@jhmi.edu)>  
**Subject: Re: acknowledgements**  
**Date:** February 17, 2018 at 10:59:38 AM EST  
**To:** Giulio Agnetti <[gagnett1@jhmi.edu](mailto:gagnett1@jhmi.edu)>

Yup, I agree to be acknowledged.

Brian O'Rourke  
Sent from my iPhone

On Feb 17, 2018, at 10:58 AM, Giulio Agnetti <[gagnett1@jhmi.edu](mailto:gagnett1@jhmi.edu)> wrote:

Hello there - just wanted to drop a line and share that I acknowledge your help with the paper that I d like to re-submit on Monday, for the 3rd time.

I am required to have your approval for that - do I?

Thanks! G

Giulio Agnetti, PhD, FAHA  
Director, Center for Research on Cardiac Intermediate Filaments  
[http://www.hopkinsmedicine.org/heart\\_vascular\\_institute/research/by\\_laboratory/](http://www.hopkinsmedicine.org/heart_vascular_institute/research/by_laboratory/)  
Johns Hopkins University School of Medicine  
720 Rutland Ave  
Ross 1042  
Baltimore, MD 21205  
[gagnett1@jhmi.edu](mailto:gagnett1@jhmi.edu)  
phone 443-287-7490  
FAX 410-502-2067

## Circulation Research

---

**Subject:** FW: Dr. Ken Margulies authorization to be acknowledged in our manuscript CIRCRES/2017/312082R2

**From:** "Margulies, Kenneth" <[Kenneth.Margulies@uphs.upenn.edu](mailto:Kenneth.Margulies@uphs.upenn.edu)>

**Subject: Re: PENN heart tissue**

**Date:** February 17, 2018 at 11:07:46 AM EST

**To:** Giulio Agnetti <[gagnett1@jhmi.edu](mailto:gagnett1@jhmi.edu)>

**Cc:** "Bedi, Ken" <[Ken.Bedi@uphs.upenn.edu](mailto:Ken.Bedi@uphs.upenn.edu)>

Dear Giulio:

Thanks for your email and its updates.

Regarding the Circ Res manuscript you mention, I think it would be appropriate to acknowledge both myself and Ken Bedi for the assistance with providing tissues for the research. By way of this email, I am affirming my willingness to be acknowledged. I am copying Ken Bedi, so that he may affirm his willingness to be acknowledged by supplementing this email.

With best regards,  
Ken

From: Giulio Agnetti <[gagnett1@jhmi.edu](mailto:gagnett1@jhmi.edu)<<mailto:gagnett1@jhmi.edu>>>

Date: Saturday, February 17, 2018 at 7:53 AM

To: K Margulies <[kenneth.margulies@uphs.upenn.edu](mailto:kenneth.margulies@uphs.upenn.edu)<<mailto:kenneth.margulies@uphs.upenn.edu>>>

Subject: Re: PENN heart tissue

Giulio Agnetti, PhD, FAHA

Director, Center for Research on Cardiac Intermediate Filaments

[http://www.hopkinsmedicine.org/heart\\_vascular\\_institute/research/by\\_laboratory/](http://www.hopkinsmedicine.org/heart_vascular_institute/research/by_laboratory/)

Johns Hopkins University School of Medicine

720 Rutland Ave

Ross 1042

Baltimore, MD 21205

[gagnett1@jhmi.edu](mailto:gagnett1@jhmi.edu)

phone 443-287-7490

FAX 410-502-2067

## Circulation Research

---

**Subject:** FW: Dr. Ken Bedi authorization to be acknowledged in our manuscript CIRCRES/2017/312082R2

**From:** "Bedi, Ken" <[Ken.Bedi@uphs.upenn.edu](mailto:Ken.Bedi@uphs.upenn.edu)>  
**Subject:** RE: PENN heart tissue  
**Date:** February 17, 2018 at 2:35:13 PM EST  
**To:** "Margulies, Kenneth" <[Kenneth.Margulies@uphs.upenn.edu](mailto:Kenneth.Margulies@uphs.upenn.edu)>, Giulio Agnetti <[gagnett1@jhmi.edu](mailto:gagnett1@jhmi.edu)>

Dear Giulio,

Thank you for the email update as well I agree with dr Margulies and am happy to be acknowledged and if you need anything further please do not hesistarw to contact me.

Best,

Ken B

---

From: Margulies, Kenneth  
Sent: Saturday, February 17, 2018 11:07 AM  
To: Giulio Agnetti  
Cc: Bedi, Ken  
Subject: Re: PENN heart tissue

Dear Giulio:

Thanks for your email and its updates.

Regarding the Circ Res manuscript you mention, I think it would be appropriate to acknowledge both myself and Ken Bedi for the assistance with providing tissues for the research. By way of this email, I am affirming my willingness to be acknowledged. I am copying Ken Bedi, so that he may affirm his willingness to be acknowledged by supplementing this email.

With best regards,  
Ken

## Circulation Research

---

**From:** Soroosh Solhjoo <soroosh@jhmi.edu>  
**Sent:** Monday, February 19, 2018 11:45 AM  
**To:** CircRes@circresearch.org  
**Cc:** Giulio Agnetti  
**Subject:** Acknowledgement authorization

Dear Madam/Sir,

I affirm my willingness to be acknowledged in the manuscript CIRCRES/2017/312082R2  
Title: DESMIN PHOSPHORYLATION TRIGGERS PREAMYLOID OLIGOMERS FORMATION AND MYOCYTE DYSFUNCTION IN  
ACQUIRED HEART FAILURE.  
by Rainer P et al.,

Sincerely  
Soroosh

---

Soroosh Solhjoo, PhD  
Division of Cardiovascular Pathology  
Johns Hopkins University School of Medicine
